# Supplementary material for: Comprehensive Analysis of 1-Year-Old Female Apolipoprotein E-Deficient Mice Reveals Advanced Atherosclerosis with Vulnerable Plaque Characteristics
Source: MDPI journal article supplement (doi:10.3390/ijms25021355), 2024-01-22
Supplement: s1 [file s1]

## Supplementary Material

### Comprehensive analysis of 1-year-old apolipoprotein E-deficient mice reveals advanced atherosclerosis with vulnerable plaque characteristics.

Sotirios Kotsovilis<sup>1,†</sup>, Maria Salagianni<sup>1,†</sup>, Aimilia Varela<sup>2</sup>, Constantinos H. Davos<sup>2</sup>, Ioanna E. Galani<sup>1</sup>, Evangelos Andreakos<sup>1\*</sup>

<sup>1</sup>Laboratory of Immunobiology, Center for Clinical, Experimental Surgery, and Translational Research, Biomedical Research Foundation, Academy of Athens, Athens, Greece

<sup>2</sup>Cardiovascular Research Laboratory, Clinical, Experimental Surgery, and Translational Research Center, Biomedical Research Foundation, Academy of Athens, Athens, Greece

\* **Correspondence:** Evangelos Andreakos: [vandreakos@bioacademy.gr](mailto:vandreakos@bioacademy.gr)

#### Supplementary Figures

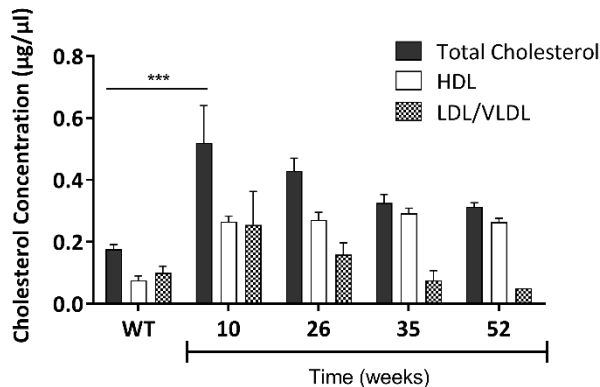

**Supplementary Figure 1. Serum cholesterol lipid profiles.** Serum concentrations of total cholesterol (black), HDL (white), LDL/VLDL (dotted) in 10-, 26- and 52-week-old *Apoe*<sup>-/-</sup> mice fed on normal chow diet ( $n = 10, 9, 9$  and  $3$  mice for each group, respectively). 10-week old wild-type (WT) mice ( $n=3$ ) fed a normal chow diet were used as controls. Statistical comparisons between groups were performed using the 2-wayAnova. \*\*\*  $p \leq 0.001$ . Whenever  $p$  value is not mentioned, differences between groups were not statistically significant ( $p > 0.05$ ).

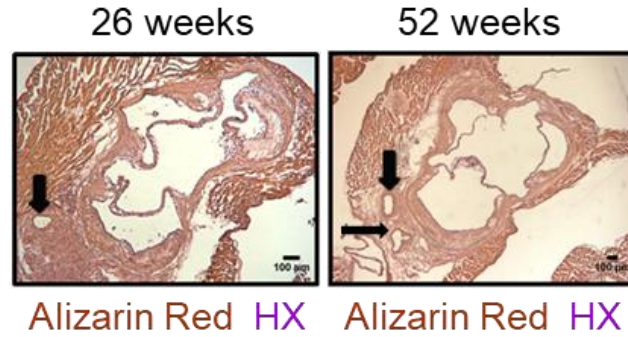

**Supplementary Figure2. Development of calcification in coronary arteries.**Representative light photomicrographs of Alizarin Red S stained serial cross sections from the aortic root of 26- and 52-week-old mice. No calcification was detected in coronary arteries (black arrows) at 26- and 52-week-old mice after Alizarin Red S staining.

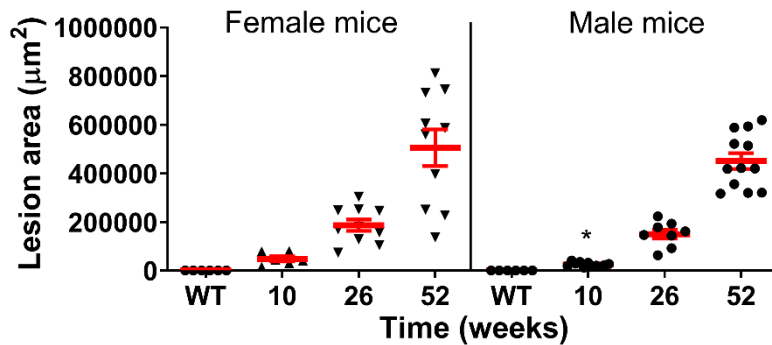

**Supplementary Figure 3. Morphometric analysis of atherosclerotic lesion area of male mice compared to female mice.** Atherosclerotic lesion area of male mice and comparison with female mice determined using morphometric analysis of Oil Red O-stained serial cross sections from the aortic root of wild-type C57BL/6 mice (WT), and 10-, 26- and 52-week-old *Apoe*<sup>-/-</sup> mice ( $n = 6, 6, 10, 10, 6, 11, 8, 12$  mice for each group, respectively). Mean value  $\pm$  standard error of the mean (SEM) are displayed in red. Statistical comparisons between same age groups were performed using

the Mann-Whitney  $U$  test. \*  $p \leq 0.05$ . Whenever  $p$  value is not mentioned, differences between groups were not statistically significant ( $p > 0.05$ ).

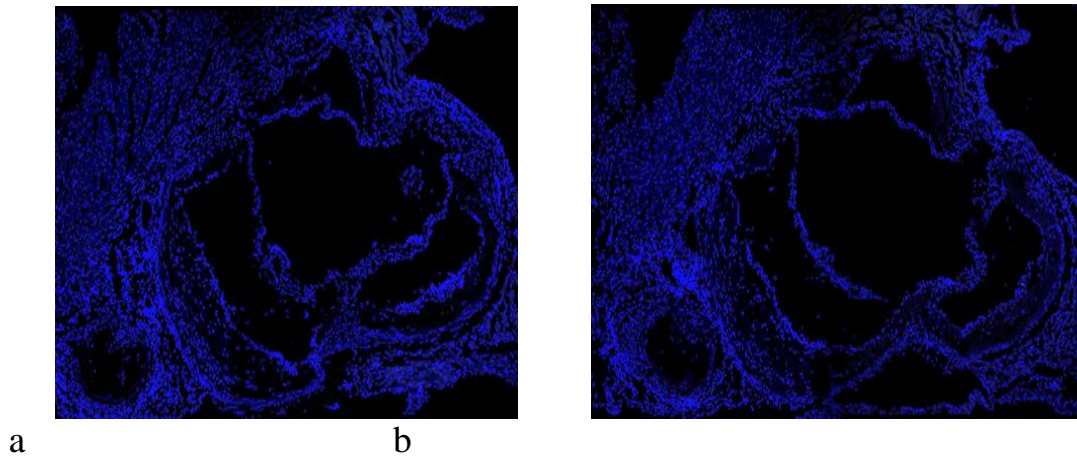

**Supplementary Figure 4. Isotype and unstained control.** (a) Absence of positive signal in an isotype control section incubated with rat IgG in the aortic root of a female *Apoe*<sup>-/-</sup> mouse aged 52 weeks. (b) Absence of positive signal in an unstained control section in the aortic root of a female *Apoe*<sup>-/-</sup> aged 52 weeks.
